# New estimates of the Zika virus epidemic attack rate in Northeastern Brazil from 2015 to 2016: A modelling analysis based on Guillain-Barré Syndrome (GBS) surveillance data

Daihai He<sup>1,\*</sup>, Shi Zhao<sup>1,2</sup>, Qianying Lin<sup>1</sup>, Salihu S. Musa<sup>1</sup> & Lewi Stone<sup>3,4,\*</sup>

**1** Department of Applied Mathematics, Hong Kong Polytechnic University, Hong Kong, China

**2** School of Nursing, Hong Kong Polytechnic University, Hong Kong, China

**3** Mathematical Science, School of Science, RMIT University, Melbourne, Vic., Australia

**4** Biomathematics Unit, School of Zoology, Faculty of Life Sciences, Tel Aviv University, Tel Aviv, Israel

\* Correspondence to: [daihai.he@polyu.edu.hk](mailto:daihai.he@polyu.edu.hk) (D.H.) & [lewistone100@gmail.com](mailto:lewistone100@gmail.com) (L.S.)

May 19, 2019

# 1 Abstract

2 **Background** Between January 2015 and August 2016, two epidemic waves of Zika virus (ZIKV)  
3 disease swept the Northeastern region of Brazil. As a result, two waves of Guillain-Barré Syndrome  
4 (GBS), were observed concurrently. The mandatory reporting of ZIKV disease began region-wide in  
5 February 2016, and it is believed that ZIKV cases were significantly under-reported before that. The  
6 changing reporting rate has made it difficult to estimate the ZIKV infection attack rate, and studies  
7 in the literature vary widely from 17% to > 50%. The same applies for other key epidemiological  
8 parameters. In contrast, the diagnosis and reporting of GBS cases were reasonably reliable given the  
9 severity and easy recognition of the diseases symptoms. In this paper, we aim to estimate the real  
10 number of ZIKV cases (i.e., the infection attack rate), and their dynamics in time, by scaling up from  
11 GBS surveillance data in NE Brazil.

12 **Methodology** A mathematical compartmental model is constructed that makes it possible to infer  
13 the true epidemic dynamics of ZIKV cases based on surveillance data of excess GBS cases. The model  
14 includes the possibility that asymptomatic ZIKV cases are infectious. The model is fitted to the  
15 GBS surveillance data and the key epidemiological parameters are inferred by using the plug-and-play  
16 likelihood-based estimation. We make use of regional weather data to determine possible climate-driven  
17 impacts on the reproductive number  $\mathcal{R}_0$ , and to infer the true ZIKV epidemic dynamics.

18 **Findings and Conclusions** The GBS surveillance data can be used to study ZIKV epidemics and  
19 may be appropriate when ZIKV reporting rates are not well understood. The overall infection attack  
20 rate (IAR) of ZIKV is estimated to be 24.1% (95% CI: 17.1% - 29.3%) of the population. By examining  
21 various asymptomatic scenarios, the IAR is likely to be lower than 33% over the two ZIKV waves. The  
22 risk rate from symptomatic ZIKV infection to develop GBS was estimated as  $\rho = 0.0061\%$  (95% CI:  
23 0.0050% - 0.0086%) which is significantly less than current estimates. We found a positive association  
24 between local temperature and the basic reproduction number,  $\mathcal{R}_0$ . Our analysis revealed that asymp-  
25 tomatic infections affect the estimation of ZIKV epidemics and need to also be carefully considered in  
26 related modelling studies. According to the estimated effective reproduction number and population  
27 wide susceptibility, we comment that a ZIKV outbreak would be unlikely in NE Brazil in the near  
28 future.

29 *Keywords:* Zika virus; Guillain-Barré syndrome; Mathematical modelling; Infection attack rate;  
30 reproduction number; Brazil.

## 31 **Author Summary**

32 The mandatory reporting of Zika virus (ZIKV) disease began region-wide in February 2016, and  
33 it is believed that ZIKV cases could have been highly under-reported before that. Given the Guillain-  
34 Barré syndrome (GBS) is relatively well reported, the GBS surveillance data has the potential to act  
35 as a reasonably reliable proxy for inferring the true ZIKV epidemics. We developed a mathematical  
36 model incorporating the weather effects to study the ZIKV-GBS epidemics and estimated the key  
37 epidemiological parameters. We found the attack rate of ZIKV is likely lower than 33% over the  
38 two epidemic waves. The risk rate from symptomatic ZIKV case to develop GBS is likely 0.0061%.  
39 According to the analysis, we comment that there would be difficult for a ZIKV outbreak to appear in  
40 NE Brazil in the near future.

## 41 1 Introduction

42 The Zika virus (ZIKV) was first identified in 1947 in the Zika forest of Uganda [1], and within a  
43 few years was found spreading in human populations of Nigeria [2, 3]. Transmitted through the bites  
44 of mosquito vectors (usually of the *Aedes* genus), ZIKV is an arbovirus from the family *Flaviviridae*  
45 [4, 5]. Other transmission routes have also been found (materno-fetal, sexual transmission, and via  
46 blood transfusion) but they are less common [6, 7, 8, 9]. By the 1970s, the virus was circulating widely  
47 in West Africa, although it was considered a relatively mild human infection that generally results in  
48 only fever, rash and possibly conjunctivitis [3, 10]. By 2007, the virus had escaped Africa to the island  
49 of Yap in Micronesia where, according to some estimates, it infected up to 75% of the island population  
50 [11]. ZIKV reached Polynesia in 2013, and at least by 2015, it had invaded Brazil and then very quickly  
51 the rest of South America where it reached epidemic levels [12, 13]. Since its appearance in French  
52 Polynesia and Brazil, the virus has been associated with severe neurological disorders linked to birth  
53 defects. ZIKV infection was found to pass from mother to fetus during pregnancy with the potential to  
54 result in microcephaly which causes fetal abnormalities including possible skull collapse [5]. In addition,  
55 since 2014 ZIKV was found to be strongly associated with the Guillain-Barré syndrome (GBS) amongst  
56 a small proportion of those infected [14, 15]. GBS can result in long-term muscle weakness, pain, and  
57 in some circumstances death [16]. Although there is still no proven causal link between GBS and ZIKV  
58 disease, GBS has many times been associated with ZIKV outbreaks in many countries [15], and the  
59 empirical association is unusually strong.

60 While considered relatively benign for decades since 1947, ZIKV disease suddenly became a major  
61 global disease threat. A Public Health Emergency of International Concern (PHEIC) was announced  
62 by the WHO on February 01, 2016 [17], in the lead-up to the Rio Olympic Games in Brazil. But until  
63 then, because of the relatively low interest in the ZIKV, surveillance in most areas was of low quality  
64 with poor coverage and consequently a large under-reporting of cases. There was little knowledge  
65 of key parameters: for example the true attack rate, the proportion of asymptomatic cases amongst  
66 infected ZIKV cases, the reproductive number. This has led to stepped up activity in surveillance and  
67 modelling efforts in recent years. But given the poor case-data available and the lack of knowledge  
68 of a reporting rate (which changed significantly in time and location) for those infected with ZIKV,  
69 results from modelling efforts have often proved to be inconsistent. Here, we take a new approach that  
70 attempts to overcome some of the problems associated with the large uncertainties associated with the  
71 reporting of ZIKV cases. Instead, we work with time series of GBS cases which should be far more  
72 reliable. We argue that a high proportion of people infected with GBS will in fact report to the doctor.  
73 Figure 1 makes clear the strong association between ZIKV cases and GBS by plotting reported cases  
74 of both diseases on the same axes. It is clear that the dynamics of the two diseases are closely in  
75 step. The unique feature of our work is that we draw on this property and fit our model to GBS data  
76 collected during and following the period of a ZIKV outbreak. We use this to infer the true numbers,  
77 and dynamics in time, of ZIKV cases.

78 For the modelling work that follows, it is useful to consider some of the above events in more detail  
79 on a country-specific basis, as they give further important background information that justifies our  
80 approach in using GBS as a proxy for zika-cases, on data sources and on choices of parameter values.

81 **French Polynesia** From October 2013 to April 2014, a severe ZIKV outbreak hit French Polynesia,  
82 and the attack rate (IAR) was first estimated as 66% [18], but updated soon after to 49% [19]. An  
83 outbreak of 42 GBS cases was simultaneously reported, but with a three-week delay in the peak timing,  
84 and was linked to the ZIKV outbreak [20]. Based on the IAR of [19], the risk of ZIKV induced GBS can  
85 thus be calculated as 0.32 GBS cases per 1,000 ZIKV infections, or just  $\rho = 0.00032$ . [20] estimated the  
86 proportion to be  $\rho = 0.00024$ . Aubry *et al.* also found that, the ratio of asymptomatic to symptomatic  
87 infections (asymptomatic ratio) was about 1:1 in the general population and 1:2 among school children  
88 [19]. These findings are notably different from estimates for a previous ZIKV outbreak in Yap island  
89 in 2007, where the asymptomatic ratio was 4.4:1 and the estimated overall ZIKV IAR was about 75%  
90 [11].

91 Following the ZIKV outbreak in French Polynesia, the region experienced a Chikungunya virus  
92 (CHIKV) disease outbreak with an estimated 66,000 cases from October 2014 to March 2015, and 9 GBS  
93 cases occurred [21]. The crude risk of CHIKV induced GBS was found to be 0.136 per 1,000 CHIKV  
94 infections. Thus, based on these studies [20, 21], a ZIKV infection is of  $(0.32 \div 0.136 =)$  2.35-fold more  
95 likely to induce GBS when compared to a CHIKV infection. Cauchemez *et al.* [18] also found that  
96 the risk of ZIKV induced microcephaly was 95 cases (34-191) per 10,000 women infected in their first  
97 trimester during 2013-14.

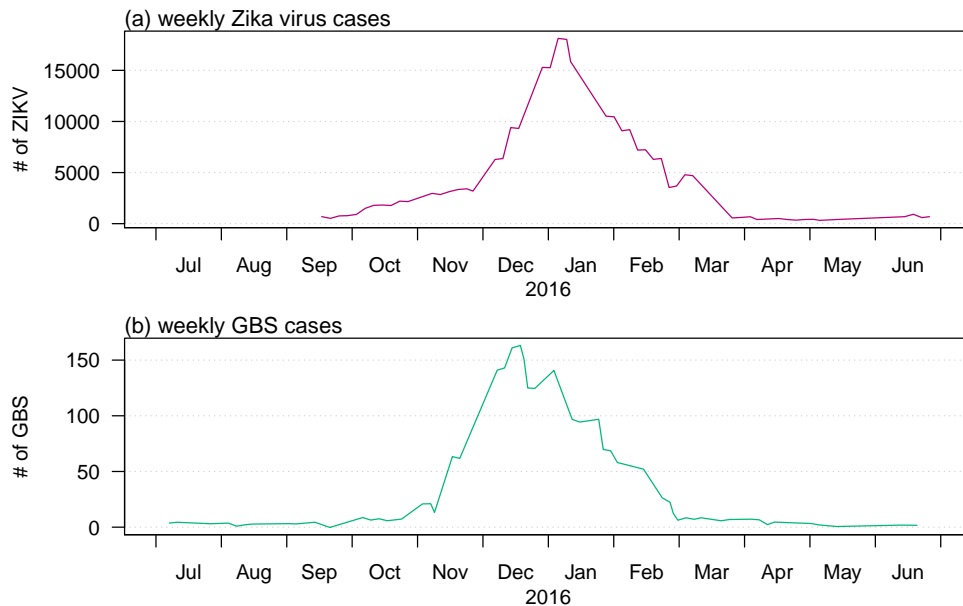

Figure 1: Total ZIKV (red) and GBS (green) cases as time series summed over the different states and countries: Bahia State, Colombia, the Dominican Republic, El Salvador, Honduras, Suriname, and Venezuela from April 01 of 2015 to March 31 of 2016. Data from Ref. [64].

98 **Northeastern Brazil** The Northeastern (NE) region of Brazil was the hardest-hit region in the  
99 Americas during 2015-16. In this period three mosquito-borne diseases - dengue virus, ZIKV and  
100 CHIKV, co-circulated often simultaneously, and weekly cases were documented [22]. In addition, local  
101 GBS and microcephaly cases were also recorded. Over the two years, two waves of ZIKV disease

102 were accompanied by two waves of reported GBS cases, as shown in Fig 2, which indicated a possible  
103 epidemiological association. A striking wave of microcephaly cases with a 23-week delay to the first  
104 ZIKV wave was identified and discussed in [22]. The delay arises because ZIKV infections in the first  
105 trimester of pregnancy are most likely to induce microcephaly [18, 23, 24, 25]).

106 A substantial CHIKV wave was also observed during the second ZIKV wave in 2016 as indicated  
107 in Fig 2 and [22]. CHIKV can induce GBS with a smaller risk ratio (1 to 2.35) than ZIKV as discussed  
108 above and according to results in [21, 26, 27, 28, 29]. Note that in the latter studies, no cases of GBS  
109 induced by dengue epidemics were reported. One recent cohort study was conducted on 345 pregnant  
110 women with ZIKV rash observed (presenting at the Oswaldo Cruz Foundation) in Rio de Janeiro (the  
111 largest city in Eastern Brazil) between September 2015 and May 2016 [25]. The IAR of CHIKV was  
112 found to be approximately 17%; and in contrast, the IAR of ZIKV was 53%, as based on PCR tests.  
113 In addition, a strong cross-protection between ZIKV and CHIKV was also observed, but no cross-  
114 protection was observed between ZIKV and dengue virus (DENV). The IAR of CHIKV was 21.1%, and  
115 41.7% for ZIKV-negative women while only 2.8% of ZIKV-positive women were infected with CHIKV.  
116 Thus, among pregnant women with rash observed in this period, the ratio of ZIKV and CHIKV is  
117 (roughly) 5 to 2. Evident cross-protection between CHIKV and ZIKV (but not between dengue and  
118 ZIKV) can be deduced from the same study with the same women [25]. Therefore, we suspect that  
119 the two waves of excess GBS cases in NE Brazil were largely due to ZIKV disease rather than CHIKV,  
120 for two reasons: (i) ZIKV is 2.35-fold likely to induce GBS than CHIKV; and (ii) ZIKV IAR could be  
121 three times higher than that of CHIKV based on the Rio de Janeiro study [25] to project the situation  
122 in NE Brazil.

123 Our work is based on the fact that it is difficult to estimate the infection attack rate (IAR) of  
124 ZIKV directly from the reported ZIKV cases time series given the non-constant reporting efforts over  
125 2015 and 2016. In the literature, estimates of the IAR of ZIKV in Brazil (especially Northeast Region  
126 of Brazil) vary from less than 20% to more than 60%, and thus appear inconclusive. A summary table  
127 is provided in the Supplementary Information S4. Most of previous works were based on unreliable  
128 ZIKV surveillance data. In this work, we aim to use the relatively reliable GBS data in NE Brazil to  
129 infer the ZIKV epidemic.

130 The under-reporting of ZIKV cases in 2015 also appears to be reflected in what was felt to be a  
131 high number of microcephaly cases (after a 26-week delay [22]). This is because microcephaly cases are  
132 easier to identify and are thus better reported [17]. Nevertheless, the reporting criteria of microcephaly  
133 cases also changed significantly over the two years [30] leading to overall unreliable estimates. Given  
134 this known and documented unreliability [30], we felt it might not be wise to estimate IAR of ZIKV  
135 directly based on the reported number of microcephaly cases.

136 However, it seems a reasonable approximation to assume that the number of GBS cases per ZIKV  
137 infected individual should remain constant in time, and that the reported GBS cases are relatively  
138 well reported over time. The reporting criteria of GBS is reasonably accurate and stable owing to the  
139 distinct identifiable and severe clinical features of GBS [16]. By assuming the GBS-ZIKV risk ratio  
140 is constant, we attempted to fit an epidemic model and infer this ratio based on the GBS cases time  
141 series. Because of the co-circulation of both dengue fever and ZIKV during the two waves, misdiagnoses  
142 of ZIKV could occur [25, 23, 22], especially given both diseases have similar symptoms. Nevertheless,  
143 no GBS induced DENV was reported in the 2015 and 2016 years. Thus, the large-scale ZIKV outbreak  
144 was the major source of the excess GBS cases [22]. For these reasons, we use the excess GBS cases time

145 series to infer the pattern of ZIKV outbreak and the overall IAR of ZIKV in Northeastern Brazil.

146 Mathematical modelling provides a possible way to infer the epidemic waves of ZIKV (or together  
147 with a minor proportion of CHIKV). First, we assume a constant risk ratio between symptomatic ZIKV  
148 cases and reported GBS cases (ZIKV-GBS ratio), denoted by  $\rho$ . Second, we simulate our ZIKV model,  
149 and fit the model to observed GBS cases with a time-dependent ZIKV transmission rate. Finally, by  
150 using iterated filtering techniques, we find the maximum likelihood estimates of  $\rho$  and the overall IAR.

## 151 2 Data and Methods

### 152 2.1 Data

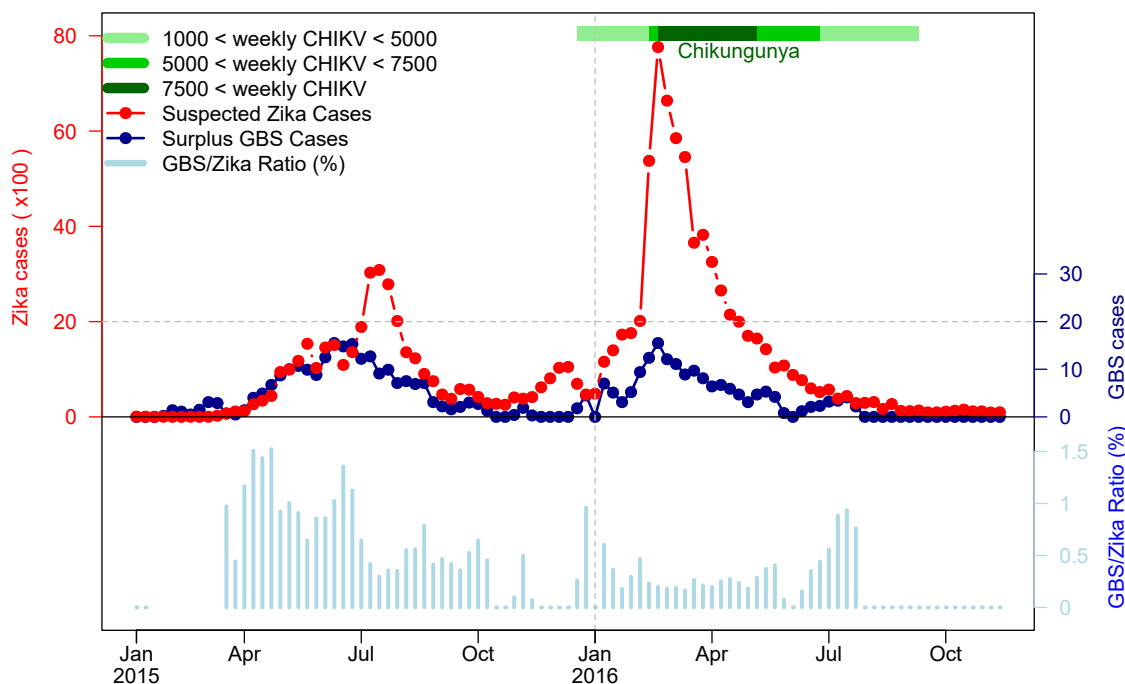

Figure 2: The (reported) suspected ZIKV cases, excess (or surplus) GBS cases and GBS-to-ZIKV ratio in the NE region of Brazil from January 2015 to November 2016. The red dotted line represents weekly ZIKV disease cases, the dark blue dotted line represents weekly surplus GBS cases and the light blue bars are GBS-to-ZIKV ratios. The “major” (with weekly cases over 1000) CHIKV outbreak of 2016 is shaded in green according to CHIKV disease level. The light green area denotes time periods when the weekly reported CHIKV cases were between 1000 - 5000, green denotes weekly reported CHIKV cases between 5000 - 7500 and dark green denotes weekly reported CHIKV cases over 7500. The GBS-to-ZIKV ratios are not plotted for the initial few weeks as the scale of the ZIKV data is not large enough to compute a meaningful ratio.

153 The reported weekly excess (or surplus) GBS cases time series of NE Brazil, from Jan 2015 to  
154 Nov 2016, were kindly provided by Professor Oliveira from the Ministry of Health in Brazil, as used

155 in their important recent study [22]. The time series are plotted in Fig 2 with datasets of ZIKV  
 156 and Chikungunya for the period. The GBS data used in this work follow the case definitions given in  
 157 Supplementary Information S1. In Fig 2 we observe that the GBS-to-ZIKV ratio of 2016 was significantly  
 158 lower than in 2015, which was likely due to the under-reporting of ZIKV epidemic before 2016 [17].

159 Daily mean temperature and total rainfall (beginning from December 1, 2014) data were obtained  
 160 from six cities in NE Brazil (source: <https://www.worldweatheronline.com/>). A map of the locations of  
 161 the six cities is given the Supplementary Information S2. We calculated the daily average temperature  
 162 and the average total rainfall across the six cities.

## 163 2.2 Methods

164 In previous work [6, 31], we developed a ZIKV transmission model, including both hosts and  
 165 vectors, based on mosquito-borne and sexual (human-to-human) transmission of ZIKV. Hosts infected  
 166 with ZIKV generate a proportion of GBS cases as determined by  $\rho$  which is the ratio of reported GBS  
 167 cases to symptomatic ZIKV cases. In our earlier work, asymptomatic ZIKV cases were assumed to be  
 168 non-infectious. However, in this work the asymptomatic ZIKV cases are now assumed to be infectious,  
 169 and we study their impact on the estimation of IAR and the ratio ( $\rho$ ). The basic reproduction number  
 170 ( $\mathcal{R}_0$ ) of the model is derived and estimated. We apply the plug-and-play likelihood-based inference  
 171 framework for model fitting [32].

### 172 2.2.1 ZIKV-GBS Model

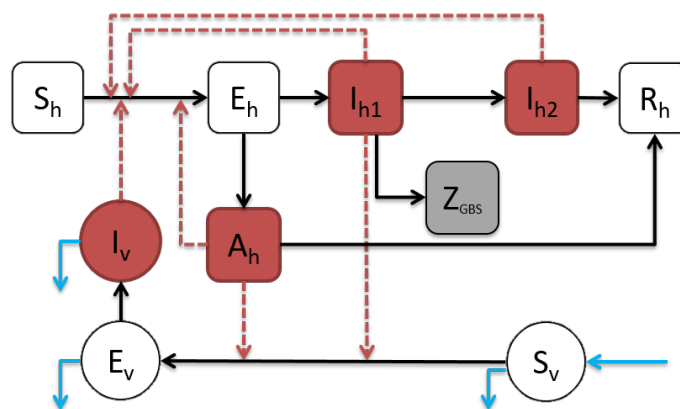

Figure 3: The ZIKV-GBS epidemic model diagram. The black arrows represent the infection status transition paths. Red dashed arrows represent transmission paths, and the light blue arrows represent the natural birth and death of mosquito vectors. Square compartments represent the host classes, and circular compartments represent the vector classes. Red compartments represent infectious classes, and the grey compartment is the (weekly) excess GBS cases ( $Z_{GBS}$ ).  $S_h, E_h, I_h, R_h$  represents the numbers of Susceptible, Exposed, Infected and Recovered host population with respect to ZIKV. Please see text below Eqns (1) for complete listing of all compartment codes.

173 Fig 3 shows the model diagram of the ZIKV disease transmission pathways in both human and  
 174 mosquito. Following our previous work [6, 31], we continue to assume that hosts infected with ZIKV are



175 infectious during the convalescent stage and can infect other susceptible hosts through sexual transmis-  
 176 sion [8, 9]. However, they are assumed to be noninfectious to susceptible mosquito vectors [19, 33, 34].

177 It is supposed that the asymptomatic cases are infectious at a weaker level than symptomatic cases  
 178 and do not develop to the convalescent stage, which is biologically and clinically reasonable [8, 9]. We  
 179 therefore arrive at the following ordinary differential equation (ODE) system (1).

$$\left\{ \begin{array}{l} S'_h = -ab \cdot \frac{I_v}{N_h} S_h - \beta \cdot \frac{\eta A_h + I_{h1} + \tau I_{h2}}{N_h} S_h, \\ E'_h = \left( ab \cdot \frac{I_v}{N_h} + \beta \cdot \frac{\eta A_h + I_{h1} + \tau I_{h1}}{N_h} \right) S_h - \sigma_h E_h, \\ A'_h = (1 - \theta) \cdot \sigma_h E_h - \gamma_h A_h, \\ I'_{h1} = \theta \cdot \sigma_h E_h - \gamma_{h1} I_{h1}, \\ I'_{h2} = \gamma_{h1} I_{h1} - \gamma_{h2} I_{h2}, \\ R'_h = \gamma_h A_h + \gamma_{h2} I_{h2}, \\ Z_{\text{GBS}}^{(i)} = \int_{\text{week } i} \rho \gamma_{h1} I_{h1} dt, \\ \\ S'_v = B_v(t) - ac \cdot \frac{\eta A_h + I_{h1}}{N_h} S_v - \mu_v S_v, \\ E'_v = ac \cdot \frac{\eta A_h + I_{h1}}{N_h} S_v - (\sigma_v + \mu_v) E_v, \\ I'_v = \sigma_v E_v - \mu_v I_v. \end{array} \right. \quad (1)$$

180 Here,  $S_h$  is the susceptible host class,  $E_h$  is the exposed host class (i.e., within ZIKV infection latent  
 181 period),  $A_h$  denotes the asymptomatic host class,  $I_{h1}$  denotes the host class infected with ZIKV,  $I_{h2}$   
 182 denotes the convalescent host class, and  $R_h$  denotes the host's recovered class. The variable  $Z_{\text{GBS}}^{(i)}$   
 183 denotes the simulated weekly excess (or surplus) reported GBS cases for the  $i$ -th week during the study  
 184 period.  $S_v$  is the susceptible vector class,  $E_v$  is the exposed vector (i.e., within ZIKV infection latent  
 185 period) and  $I_v$  denotes the infectious vector class. The parameter  $\rho$  denotes the ratio of reported (excess)  
 186 GBS cases per symptomatic case of ZIKV. The model (1) parameters are summarised in Table 1.

187 In addition,

$$\begin{aligned} N_h &= S_h + E_h + A_h + I_{h1} + I_{h2} + R_h, \\ N_v &= S_v + E_v + I_v, \end{aligned}$$

188 where  $N_h$  and  $N_v$  represent the total number of hosts and vectors respectively, of which  $N_v$  is time-  
 189 dependent. The population of the Northeastern (NE) region of Brazil in 2014 was  $N_h = 56.7$  million  
 190 [35].

191 As in our previous work, it is assumed that the total mosquito population is given by:

$$N_v(t) = m(t) \cdot N_h, \quad (2)$$

192 where  $m(t)$  is the (time-dependent) ratio of mosquitoes population ( $N_v(t)$ ) to humans population ( $N_h$ ).  
 193 In the model simulation, in order to reflect the changing dynamics of  $m(t)$  to the mosquito population,

Table 1: Summary table of model parameters in Eqns (1). The “H” denotes human hosts’ population, and “V” denotes mosquito vectors’ population. “X→Y” denotes ZIKV infected class X infects the (ZIKV) susceptible class Y.

| Parameter                                                           | Notation           | (Value)/Range       | Remark/Unit    | Status          | Source(s)    |
|---------------------------------------------------------------------|--------------------|---------------------|----------------|-----------------|--------------|
| Mosquito biting rate                                                | $a$                | (0.5) 0.3 - 1.0     | per vector·day | fixed           | [6, 43, 60]  |
| Transmission prob. of host                                          | $b$                | (0.4) 0.10 - 0.75   | per bite       | fixed           | [6, 43, 60]  |
| Transmission prob. of vector                                        | $c$                | (0.5) 0.30 - 0.75   | per bite       | fixed           | [61]         |
| Transmission rate by contact                                        | $\beta$            | (0.05) 0.001 - 0.10 | per day        | fixed           | [6]          |
| Host latent period                                                  | $\sigma_h^{-1}$    | (5) 2 - 7           | days           | fixed           | [10, 62]     |
| Vector latent period                                                | $\sigma_v^{-1}$    | (10) 8 - 12         | days           | fixed           | [60, 63]     |
| Asymptomatic infectious period                                      | $\gamma_h^{-1}$    | (7) 5 - 10          | days           | assumed         | Nil          |
| Infectious period                                                   | $\gamma_{h1}^{-1}$ | (5) 3 - 7           | days           | fixed           | [6, 62]      |
| Convalescent infectious period                                      | $\gamma_{h2}^{-1}$ | (25) 14 - 30        | days           | fixed           | [33, 34]     |
| Proportion of symptomatic                                           | $\theta$           | (50%) 20% - 80%     | Nil            | to be estimated | [19]         |
| infectivity scale of asymptomatic                                   | $\eta$             | 0.0 - 0.99          | H→H, H→V       | to be estimated | Nil          |
| infectivity scale of convalescent                                   | $\tau$             | (0.3) 0.01 - 0.99   | H→H            | fixed           | [6]          |
| female vector lifespan                                              | $\mu_v^{-1}$       | (25) 4 - 35         | days           | fixed           | [60, 61]     |
| Ratio: $\frac{\text{reported GBS}}{\text{symptomatic ZIKV}}$        | $\rho$             | 0.001% - 0.1%       | Nil            | to be estimated | [15, 19, 20] |
| Ratio: $\frac{\text{mosquito population}}{\text{human population}}$ | $m(t)$             | 0 - 20              | time-dependent | to be estimated | [6, 31, 43]  |
| Initial susceptible proportion                                      | $S_h(0)/N_h$       | 0.25 - 1.0          | Nil            | to be estimated | [6]          |

194 we increase the susceptible mosquitoes appropriately when  $m(t)$  increases, and remove the susceptible  
 195 and infectious mosquitoes when  $m(t)$  decreases to compensate. In other words, the human population  
 196 ( $N_h$ ) is fixed to be constant, whereas we vary the mosquito population ( $N_v(t)$ ) to reconstruct the  
 197 time-dependent  $m(t)$ .

## 198 2.2.2 Basic Reproduction Number

199 Following previous studies, the basic reproduction number,  $\mathcal{R}_0$ , is derived using the next generation  
 200 matrix method [6, 36, 37, 38]. We have

$$\mathcal{R}_0 = \frac{\mathcal{R}_h + \sqrt{\mathcal{R}_h^2 + 4\mathcal{R}_v^2}}{2}, \quad (3)$$

201 where

$$\mathcal{R}_h = \beta \cdot \left[ \eta \cdot \frac{1 - \theta}{\gamma_h} + \theta \cdot \left( \frac{1}{\gamma_{h1}} + \frac{\tau}{\gamma_{h2}} \right) \right],$$

202 and

$$\mathcal{R}_v = a \cdot \sqrt{bcm \cdot \frac{\theta\gamma_h + (1 - \theta)\eta\gamma_{h1}}{\gamma_h\gamma_{h1}} \cdot \frac{\sigma_v}{\mu_v \cdot (\mu_v + \sigma_v)}}.$$

203 From Eqn (3), it can be seen that  $\mathcal{R}_0$  depends on the mosquito-borne transmission path (in term of  
 204  $\mathcal{R}_v$ ) and the human-to-human transmission path (in term of  $\mathcal{R}_h$ ). Furthermore, if one excludes the

205 exposed and asymptomatic compartments,  $\lim_{\mathcal{R}_h \rightarrow 0^+} \mathcal{R}_0 = \mathcal{R}_v = a \cdot \sqrt{\frac{bcm}{\gamma h_1 \mu_v}}$ , which provides the basic  
 206 reproduction number of the classical Ross-Macdonald malaria model [6, 39, 40].

### 207 2.2.3 Model Fitting and Parameter Estimation

208 To evaluate our methodology, model (1) was set up to fit the real epidemic data in NE Brazil. The  
 209 time series of the number of weekly excess GBS cases in NE Brazil is modelled as a partially observed  
 210 Markov process (POMP, also know as hidden Markov model) with a “spillover” rate ( $\rho$ ) from local  
 211 symptomatic ZIKV cases. Here  $\rho$  is the combined effect of the GBS reporting ratio and the risk rate of  
 212 “symptomatic ZIKV inducing GBS i.e., the ratio  $\rho = \frac{\text{reported GBS}}{\text{symptomatic ZIKV}}$  (see Table 1).

213 The simulated (weekly) number of excess GBS cases ( $Z_{\text{GBS}}$ ) from model (1) is considered as the  
 214 theoretical or true number of cases. And the corresponding observed GBS cases of the  $i$ -th week,  $C_{\text{GBS}}^{(i)}$ ,  
 215 are assumed to have a Negative-Binomial (NB) distribution [6, 32, 41, 42, 43, 44].

$$C_{\text{GBS}}^{(i)} \sim \text{NB} \left( n = \frac{1}{\tau}, p = \frac{1}{1 + \tau Z_{\text{GBS}}^{(i)}} \right) \quad \text{with mean: } \mu_i = Z_{\text{GBS}}^{(i)}. \quad (4)$$

216 Here,  $\tau$  denotes an over-dispersion parameter that needs to be estimated. Finally, the overall log-  
 217 likelihood function,  $\ell$ , is given by

$$\ell \left( \Theta | C_{\text{GBS}}^{(1)}, \dots, C_{\text{GBS}}^{(N)} \right) = \sum_{i=1}^T \log \left[ L_i \left( C_{\text{GBS}}^{(N)} | C_{\text{GBS}}^{(1)}, \dots, C_{\text{GBS}}^{(i-1)}; \Theta \right) \right]. \quad (5)$$

218 The vector  $\Theta$  denotes the parameter vector under estimation. The  $L_i(\cdot)$  is the likelihood function  
 219 associated with the  $i$ -th NB prior defined in Eqn (4). The term  $T$  denotes the total number of weeks  
 220 during the study period.

221 Our methodology reconstructs the mosquito abundance  $m = m(t)$  which is otherwise unknown  
 222 but variable and time-dependent over the study period. Following Eqn (3), the basic reproduction  
 223 number is a function of  $m(t)$ , and thus we also allow  $\mathcal{R}_0$  to be time-dependent (i.e.,  $\mathcal{R}_0 = \mathcal{R}_0(t)$ ). The  
 224 time-dependent  $m(t)$  is climate-driven and modelled as an exponential function of the daily average  
 225 temperature and rainfall time series, together with a two-piece step function for the baseline component.  
 226 It is modelled as follows

$$\begin{aligned} m(t) &= m(t; \tau_0, \tau_1, p_1, p_2, p_3, p_4) \\ &= \exp [p_1 \text{Temperature}(t - \tau_0) + p_2 \text{Rainfall}(t - \tau_0) + p_3 \mathbf{1}(t < \tau_1) + p_4 \mathbf{1}(t \geq \tau_1)]. \end{aligned} \quad (6)$$

227 The term  $\tau_0$  is the time delay between the occurrence of weather factors and their effects on the  
 228 GBS epidemic. It contains the lagged effect on the local mosquito population, the progress from ZIKV  
 229 to GBS development and any reporting delay. From previous studies [22, 45], there exists a time delay  
 230 of at least 3 weeks between the exposure of patients to ZIKV and the development of GBS (i.e., an  
 231 incubation period plus a typical reporting delay). For the mosquito, the life cycle progresses from an  
 232 egg to an adult, and maturity takes approximately 8-10 days [46]. Therefore, the time lag of the effects  
 233 from the weather factors are taken to be one month in total i.e.,  $\tau_0 = 3 \times 7 + (8 + 10)/2 = 30$  days.

234 In Eqn (6),  $p_1$  and  $p_2$  are the scale parameters controlling the effects of local temperature and  
235 rainfall respectively. The two terms  $p_3$  and  $p_4$ , are time-driven baseline effects characterizing trends in  
236  $m$  that switch on depending on the time period  $\tau_1$ . We could view  $\tau_1$  as the timing of baseline change in  
237 the mosquito population, which could be due to the interference between ZIKV and CHIKV for instance  
238 and/or local mosquito control measures. The function  $\mathbf{1}(\cdot)$  is an indicator function, which equals 1, if  
239 the condition in the brackets is true; but is 0 otherwise.

240 Based on fitting and comparisons, the scale of  $p_2$  was found to be negligible in magnitude, indicating  
241 that the effects of the local rainfall is (relatively) negligible, compared to temperature. Thus, in most  
242 parts of the analysis that follows, we neglect the rainfall term in Eqn (6) for simplicity.

243 We note that the average lifespan of the female mosquito  $\mu_v$  is approximately 30 days. This differs  
244 from Zhang *et al.* who suggest the average lifespans goes from just under 1 day up to 7.2 days [12].  
245 In this respect, their parametrisation seems problematic, and they probably considered the average  
246 lifespan of the mosquito, rather than the female mosquito.

247 According to Eqn (3),  $\mathcal{R}_0$  is a function of  $m(t)$ , and thus  $\mathcal{R}_0$  is also time-dependent. Hence,  $\mathcal{R}_0$   
248 can also be determined by the parameters in Eqn (6), i.e.,  $\mathcal{R}_0 = \mathcal{R}_0(m) = \mathcal{R}_0(t; \tau_0, \tau_1, p_1, p_2, p_3, p_4)$ .  
249 Besides the climate-driven model, we also test a non-mechanistic model where the mosquito population  
250 (or transmission rate) is an exponential function of the a cubic spline function. Similar techniques  
251 were used in our previous work [43]. We compare the result with the climate-driven model and the  
252 non-mechanistic model.

253 The parameter fitting and inference process are rigorously and exhaustively checked within biolog-  
254 ically and clinically reasonable ranges. We should have confidence that the fits of observed time-series  
255 are realistic because of the consistency with the true underlying epidemiological processes rather than  
256 because of artificial model over-fitting. The maximum likelihood estimate (MLE) approach is adopted  
257 for model parameter estimation. The 95% confidence intervals (CI) of parameters are estimated based  
258 on the parameter ranges in Table 1, using the method of profile likelihood confidence intervals [31, 32].

259 The Bayesian Information Criterion (BIC) is employed as a criterion for model comparison, and  
260 quantifies the trade-off between the goodness-of-fit of a model and its complexity [47]. The simulations  
261 were conducted by deploying the Euler-multinomial integration method with the time-step fixed to one  
262 day [32, 39]. We deploy the iterated filtering and plug-and-play likelihood-based inference frameworks  
263 to fit the reported number of excess GBS cases time series [6, 32, 43, 48, 49]. The R package “POMP”  
264 is available via [50]. Parameter estimation and statistical analysis are conducted by using R (version  
265 3.3.3) [51].

## 266 3 Results

### 267 3.1 Connecting the GBS and ZIKV data, and changing reporting rates

268 Figure 1 plots the time series of ZIKV cases and GBS from the period April 1 of 2015 to March  
269 31 of 2016. The data are an aggregation of the six countries Columbia, the Dominican Republic, El  
270 Salvador, Honduras, Suriname, and Venezuela as well as the Bahia State in Brazil. These time series  
271 demonstrate the tight connection between the reported ZIKV disease and GBS, whose case numbers  
272 closely mimic one another in time. The connection is the basis of our method for estimating ZIKV  
273 cases from GBS reports, which as we have discussed, are by their nature, reasonably reliable records.

274 The North East Brazil datasets are plotted in Figure 2. Here we see two epidemic outbreaks of  
275 reported ZIKV cases, where the second outbreak in 2016 is far stronger than the first in 2015. Despite  
276 this, the two waves of GBS appear similar over the two years although a close examination reveals there  
277 were fewer cases in 2016. If one ignores possible regional difference and adopts the GBS-ZIKV risk rate  
278 of 0.032% i.e., 0.32 GBS cases per 1,000 ZIKV infections (asymptomatic and symptomatic) calculated  
279 in [20], the total cases of ZIKV can be approximated according to the excess GBS cases time series  
280 (Fig 2). But this is a naive calculation and we will seek ways to improve this.

281 Tallying the case numbers, in 2015 there were 233 excess GBS cases and 38,641 reported ZIKV  
282 cases, but in 2016 there were 168 excess GBS cases and 70,916 reported ZIKV cases. The ratio of  
283 GBS/Zika reported cases is plotted (blue) in Fig 2, and one sees the transition from GBS/ZIKV(reported)  
284 ( $= 233 \div 38641 = 0.60\%$  in the first year (2015) to GBS/ZIKV(reported)  $= 168 \div 70916 = 0.24\%$  in the  
285 second year (2016).

286 Let us first assume that the GBS/ZIKV (reported) ratio did not change in time in any major way  
287 over the two years 2015 and 2016. Our analysis of data from the time series in Fig 2 shows that as  
288 GBS cases dropped from 233 cases in 2015, to 168 cases in 2016, i.e. by a factor of 0.72 (168/233), the  
289 number of reported ZIKV cases rose by a factor of 70,916  $\div$  38,641 = 1.8. The only explanation for this  
290 is that there must have been a major under-reporting of ZIKV cases in the first year of 2015 [44, 52].  
291 This also seems reasonable since in 2015 the official WHO ZIKV reporting program had not yet been  
292 launched [17]. Suppose now the GBS/ZIKV(reported) ratio was 0.24% in both 2015 and 2016 even  
293 though we know that this could not be the case. A simple calculations shows that there should have  
294 been some 98,353 ( $= 233 \times 70916 \div 168$ ) ZIKV reported cases in 2015 rather than only the 38,641 cases  
295 that were reported in reality. Thus for the 2015 year it would appear that ZIKV was under-reported  
296 by a factor of 2.5 when compared to the ZIKV reporting rate in 2016.

## 297 3.2 Fitting the model to GBS data

298 We fit model (1) based on the reported excess GBS cases time series shown by the dark blue  
299 dotted line in Figure 2. This was repeated for different sets of baseline parameters. Several different  
300 (possible) values of  $\eta$  (asymptomatic ZIKV relative infectivity) and  $\theta$  (proportion of symptomatic ZIKV  
301 infections) were considered. The  $\theta = 0.5$  simulations correspond to a 1:1 ratio of the symptomatic to  
302 asymptomatic ZIKV infection of [19]. And  $\theta = 0.2$  simulations correspond to the 4:1 ratio of the  
303 symptomatic to asymptomatic ZIKV infection of [11].

304 Fig 4 shows the fitting results with  $\theta = 0.5$  and  $\eta = 0.3$ . The mean GBS values for 1000 simulations  
305 are plotted (red) in time and fit the trajectory of the reported GBS cases (black line) closely. The  
306 grey shading gives the 95% credible interval (CI) of the case numbers for each day of the simulation.  
307 The models fits the data well, and all 95% CI cover the associated observation. This indicates the  
308 simulation outcomes are not statistically different to the observations, and thus our model successfully  
309 reconstructed the two waves of the ZIKV epidemic in NE Brazil. We estimate the time-dependent  $\mathcal{R}_0(t)$   
310 which ranged from 1.1 to 3.3 over the whole study period. The simulations determine the best fitting  
311 initial condition of susceptible population is  $S_h(0) = 0.55$ . The inserted panel shows the parameter  
312 estimation of  $\rho$  found where the likelihood profile reaches the minimum BIC value. Namely, we fix  $\rho$  at  
313 20 values over a range, fit the model (1) to the GBS data, and calculate the BIC. While the minimum  
314 is  $\rho = 0.00061$ , a value of  $\rho$  from 0.00005 to 0.0001 will yield an (almost) equivalent level of BIC given

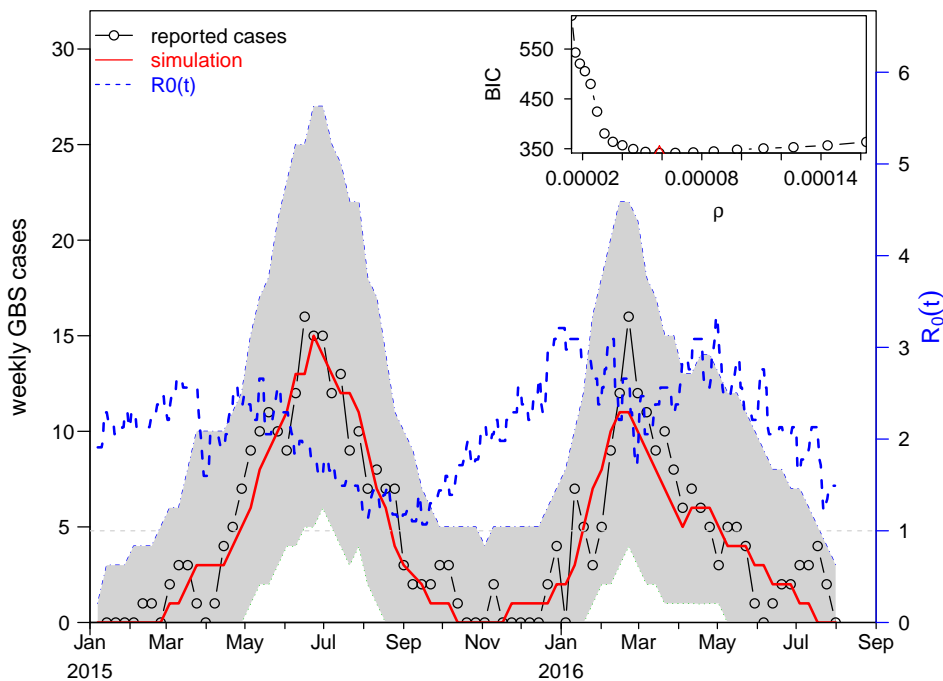

Figure 4: The fitting results for  $\theta = 0.5$  and  $\eta = 0.3$ . The fitting results in the main panel show the best scenario, which attains the smallest BIC. The red line is a plot of the mean GBS cases averaged from 1000 simulations plotted as a function of time. The grey shaded area shows the 95% credible interval (CI) of the fitted number of GBS cases. The inset panel shows the profile of BIC as a function of  $\rho$ . The minimum occurs at  $\rho = 0.000061$ , which is our best estimate for  $\rho$ .

315 the flatness of the curve in this regime.

316 In addition to the mechanistic reconstruction of  $\mathcal{R}_0(t)$  in the main results here, we also present  
 317 a non-mechanistic reconstruction in Supplementary Information S3. The non-mechanistic approach  
 318 is implemented by using a cubic spline function to reconstruct the  $\mathcal{R}_0(t)$ . The model also fits the  
 319 disease surveillance data well. The BIC of the non-mechanistic model is 7 units larger than the above  
 320 climate-driven model in Fig 4. We find that the non-mechanistic reconstruction of  $\mathcal{R}_0$  matches the daily  
 321 temperature reasonably well. This suggests the weather-driven  $\mathcal{R}_0(t)$  in our main results here is neither  
 322 coincidental nor artificial.

### 323 3.3 Estimation of Attack Rate (IAR) and model parameters

324 The estimates of the GBS/ZIKV ratio  $\rho$  and the IAR are summarised in Table 2. For the parameter  
 325 ZIKV symptomatic ratio,  $\theta$ , we follow the previous serological study conducted in French Polynesia that  
 326 found asymptomatic : symptomatic case ratios is 1 : 1 in the general population [19]. Thus, we treat  
 327 the scenarios with  $\theta = 0.5$  in our main results. Setting a constant  $\theta = 0.5$ , the estimation of  $\rho$  is roughly  
 328 0.000063 (= 0.0063%). This appears to hold even if  $\eta$ , the relative infectivity of the asymptomatics, is  
 329 changed over the interval (0, 1). Estimates of  $\rho$  thus appear to be reasonably insensitive to the change of

330 relative infectivity of the asymptomatics ( $\eta$ ). However,  $\rho$  is sensitive to the change of the symptomatic  
 331 proportion of ZIKV infections ( $\theta$ ). Setting  $\theta = 0.2$  gives  $\rho = 0.00013$ , but as Table 2 reveals, this result  
 332 is also relatively insensitive to changes in  $\eta$ .

333 To calculate the number of ZIKV cases and IAR, we use our estimated  $\rho = 0.00061$  (ratio of  
 334 reported GBS to symptomatic ZIKV), and we denote our ZIKV symptomatic ratio by  $\theta$ . The  $\rho$  can be  
 335 estimated from the model. Then, the number of ZIKV cases equals (the number of reported GBS)  $\div$   
 336 [reported GBS/symptomatic ZIKV]  $\div$  (ZIKV symptomatic ratio), which is the number of the reported  
 337 GBS/ $\rho/\theta$ . Therefore, the IAR equals the number ZIKV cases  $\div$  the total population in the NE Brazil.

338 For all pairs of  $\theta$  and  $\eta$  in Table 2, the estimated IARs are similar with IAR  $\approx$  from 22% to 28%  
 339 and the 95% CIs largely overlap. Thus, for  $\theta = 0.5$ , we can be at least 95% sure the IAR of the ZIKV  
 340 epidemic is below 33%, and is likely to be well below.

Table 2: Summary table of the estimation results of  $\rho$  and IAR. The estimates with  $\theta = 0.5$  and  $\eta = 0.3$  are used as main results, also in Fig 4.

| $\theta$ | $\eta$ | $\rho$   | 95% CI              | IAR    | 95% CI           |
|----------|--------|----------|---------------------|--------|------------------|
| 0.5      | 0.1    | 0.000053 | (0.000046,0.000080) | 0.2792 | (0.1841, 0.3234) |
| 0.5      | 0.3    | 0.000061 | (0.000050,0.000086) | 0.2411 | (0.1711, 0.2932) |
| 0.5      | 0.5    | 0.000063 | (0.000049,0.000086) | 0.2352 | (0.1711, 0.3005) |
| 0.5      | 0.7    | 0.000063 | (0.000050,0.000084) | 0.2352 | (0.1753, 0.2932) |
| 0.5      | 0.9    | 0.000067 | (0.000053,0.000086) | 0.2186 | (0.1711, 0.2792) |
| 0.2      | 0.1    | 0.000139 | (0.000083,0.000169) | 0.2645 | (0.2175, 0.4423) |
| 0.2      | 0.3    | 0.000129 | (0.000117,0.000178) | 0.2847 | (0.2071, 0.3140) |

341 The estimates of the initial susceptible levels ( $S_h(0)$ ) and the parameters ( $p_1$ ,  $p_3$  and  $p_4$ ) that  
 342 control the temporal pattern of  $\mathcal{R}_0(t)$  are summarised in Table 3. Note that according to Eqn (3),  $m$   
 343 is proportional to  $\mathcal{R}_v^2$  (i.e.,  $m \propto \mathcal{R}_v^2$ ), a key term in the formula for the basic reproduction number. It  
 344 is not hard to show that  $[\exp(0.5p_1) - 1] \times 100\%$  is the change rate in  $\mathcal{R}_v$  when there is one unit ( $^{\circ}\text{C}$ )  
 345 increase in temperature. From Table 3, one unit increase in temperature will lead to an increase of  
 346  $(\exp(0.5 \times 0.52) - 1 =)$  29.7% in  $\mathcal{R}_v$  when  $\eta = 0.1$ . And one unit increase in temperature will lead to  
 347  $(\exp(0.5 \times 0.53) - 1 =)$  30.3% increase in  $\mathcal{R}_v$  when  $\eta = 0.3$ . Eqn (3) shows the  $\mathcal{R}_0$  is comprised of  $\mathcal{R}_v$  and  
 348  $\mathcal{R}_h$ , where the  $\mathcal{R}_h$  is the contribution from the sexual transmission path. The sexual transmissibility  
 349 of ZIKV can be ignored owing to (i) the contribution of this path is negligibly small [6, 7]; and (ii) the  
 350 sexual contact is recommended to be prevented during the ZIKV epidemics [10]. Hence, the  $\mathcal{R}_h$  could  
 351 be very close to zero, and its contribution to the whole  $\mathcal{R}_0$  is probably far less than the mosquito-borne  
 352 transmission  $\mathcal{R}_v$ . According to Eqn (3),  $\mathcal{R}_0 = \mathcal{R}_v$  when  $\mathcal{R}_h = 0$ . Provided  $\lim_{\mathcal{R}_h \rightarrow 0^+} \mathcal{R}_0 = \mathcal{R}_v$ , the  
 353 effect of the temperature to  $\mathcal{R}_v$ , determined by the  $p_1$  estimate, is (almost) equivalently applicable to  
 354  $\mathcal{R}_0$ .

355 In table 3, the  $S_h(0)$  is estimated to be 0.55 (95% CI: 0.47-0.73) when  $\eta = 0.1$ , and 0.57 (95%  
 356 CI: 0.46-0.74) when  $\eta = 0.3$ . The large overlap in the 95% CIs indicates that the two  $S_h(0)$  estimates  
 357 are not statistically different. According to the 95% CIs of  $S_h(0)$ , it is likely that over a quarter (i.e.,  
 358  $> 25\%$ ) of the whole population were not involved in the 2015-16 ZIKV epidemic.

359 We estimate that the time points ( $\tau_1$ ) when the baseline of  $m(t)$  (or  $\mathcal{R}_0(t)$ ) changes from  $p_3$  to  
 360  $p_4$  in Eqn (6). It was found that  $\tau_1$  is most likely to be March 7 of 2016. For the parameters  $p_3$

Table 3: Summary table of the estimation results of the initial susceptibility ( $S_h(0)$ ) and parameters  $p_1$ ,  $p_3$  and  $p_4$  in Eqn (6). The estimates with  $\theta = 0.5$  and  $\eta = 0.3$  are used as main results, also in Fig 4.

| $\theta$ | $\eta$ | $S_h(0)$ | 95% CI      | $p_1$ | 95% CI      | $p_3$ | 95% CI      | $p_4$ | 95% CI      |
|----------|--------|----------|-------------|-------|-------------|-------|-------------|-------|-------------|
| 0.5      | 0.1    | 0.55     | (0.47,0.73) | 0.52  | (0.44,0.63) | 0.53  | (0.40,0.67) | 0.25  | (0.16,0.37) |
| 0.5      | 0.3    | 0.57     | (0.46,0.74) | 0.53  | (0.44,0.63) | 0.44  | (0.34,0.55) | 0.21  | (0.13,0.31) |

361 and  $p_4$ , we find significant difference in the baseline levels of  $m$ , which suggested the existence of the  
 362 non-weather-driven temporal changes in the ZIKV transmissibility.

### 363 3.4 Results of the Sensitivity Analysis

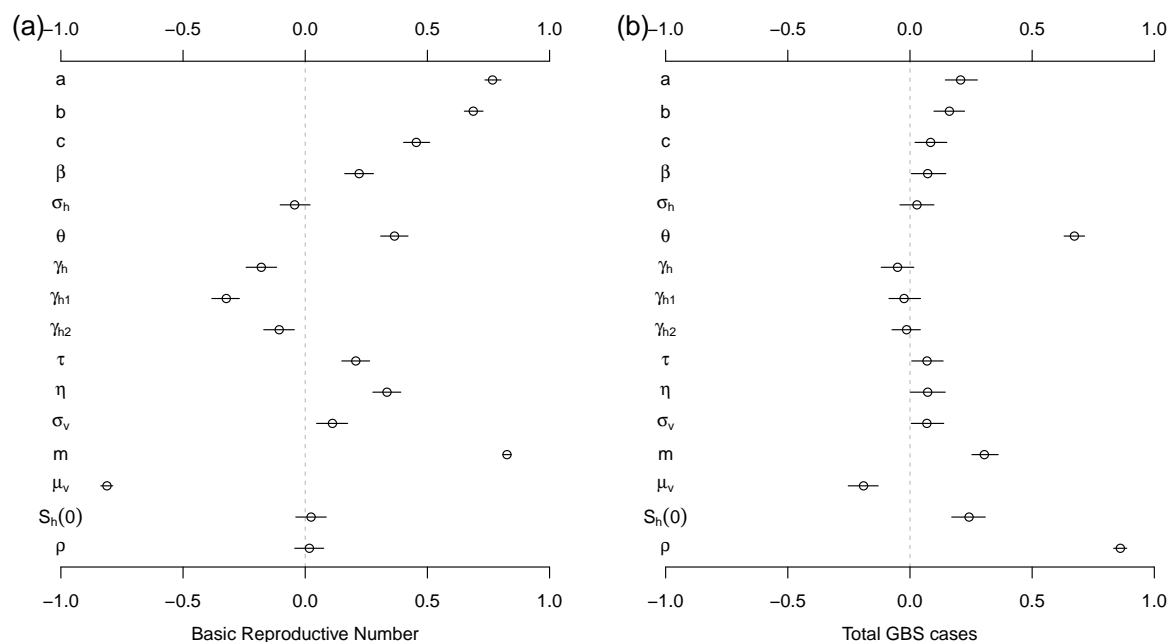

Figure 5: The Partial Rank Correlation Coefficients (PRCC) of the basic reproduction number,  $\mathcal{R}_0$ , (panel (a)) and total GBS cases (panel (b)) with respect to model parameters. The  $S_h(0)$  in this figure denotes the initial susceptible ratio, i.e.,  $S_h(0)/N_h$ . The black circle is the estimated correlation, and the bar represents 95% CI. The ranges of parameters are in Table 1.

364 As is conventional, the Partial Rank Correlation Coefficients (PRCC) are adopted to perform a  
 365 sensitivity analysis of the model [6, 43, 49, 53]. Firstly, 1000 random samples are taken from uniform  
 366 distributions of each model parameters. The ranges as set out in Table 1. Secondly, for every random  
 367 parameter sample set, the ZVD-GBS model was simulated to obtain the target biological quantities  
 368 (e.g.,  $\mathcal{R}_0$  and total number of GBS cases in this study). Finally, PRCCs were calculated between each  
 369 parameter and target biological quantities.

370 Results of the sensitivity analysis are presented in Fig 5, which indicates how model parameters  
 371 impact the basic reproduction number ( $\mathcal{R}_0$ ) and the total reported GBS cases.  $\mathcal{R}_0$  is most sensitive



372 to the vector's biting rate ( $a$ ), the vector to host ratio ( $m$ ) and the vectors' lifespan ( $\mu_v^{-1}$ , or vectors'  
373 natural death rate,  $\mu_v$ ), indicating the importance of the mosquitoes role in disease transmission. The  
374 total reported GBS cases are considerably sensitive to the proportion of symptomatic cases ( $\theta$ ), and the  
375 ratio (or risk) of excess GBS cases to symptomatic ZIKV infections ( $\rho$ ).

## 376 4 Discussion

377 Based on the striking parallel between cases of ZIKV disease and cases of GBS, as seen in Figure 1,  
378 we have proposed a ZIKV model that is calibrated on case data of GBS. ZIKV case numbers are  
379 obtained by scaling up from GBS. The advantage of this practice is that the GBS case numbers are  
380 more trustworthy and reliable compared to numbers obtained through surveillance of ZIKV where there  
381 is much scope for errors in the reporting rate. Our model considers heterogeneity in symptomatic and  
382 asymptomatic ZIKV infections (i.e.,  $\theta$  and  $\eta$ ) as well as the local mosquito population ( $m$ ). Model (1)  
383 was fitted to the reported excess GBS cases time series with different sets of parameters for symptomatic  
384 proportion ( $\theta$ ) and asymptomatic infectivity ( $\eta$ ).

385 From a recent metadata study [20] and a serological study [19], the ratio  $\rho$  of GBS to symptomatic  
386 ZIKV cases was found to be 0.00024 and 0.00032 respectively (see Introduction of this study). Similarly,  
387 based on the data from eleven countries, Mier-y-Teran-Romero *et al.* [15] found the overall estimate for  
388 the risk of reported GBS “was 2.0 (95% CI 0.5-4.5) GBS reported cases per 10,000 ZIKV infections, i.e.,  
389 0.02%, (which is) close to the point estimate of 2.4 GBS cases per 10,000 ZIKV, i.e., 0.024 %, infections  
390 estimated using only data from French Polynesia”. In this study, the model estimation finds a ratio  
391 between GBS and symptomatic ZIKV cases as  $\rho = 0.000061$  or equivalently  $\rho = 0.0061\%$  with 95% CI  
392 0.0050%-0.0086%. This or 1 GBS case per 16,393 ZIKV symptomatic cases which is approximately one  
393 quarter or 25% the magnitude of existing estimates. Our estimate, although still tentative and based on  
394 reasonable first approximations, seems plausible since ZIKV surveillance was generally unreliable and  
395 probably severely underreported, especially before 2016 [44, 52]. For this reason, we avoided using the  
396 ZIKV surveillance data to fit the epidemic model, and our estimate of  $\rho$  depends on the more reliable  
397 GBS data.

398 The model analysis estimated the IAR of ZIKV cases in NE Brazil to lie between 22% to 28% for  
399 the two waves. This is based on the assumption that the proportion of symptomatics  $\theta = 0.5$ , which  
400 appears to be reliable according to the serological results of Aubry *et al.* [19]. This is in line with a  
401 number of model and empirical estimates for other areas of Brazil and South America. For example,  
402 Zhang *et al.* estimated some 18% IAR for the areas in Brazil [12]. In pointing this out, we must also  
403 note that most IAR estimates in the literature need to be treated with caution. Due to poor surveillance  
404 and limited knowledge about the ZIKV reporting ratio, the estimates may have been based on samples  
405 that are not representative of the general population as a whole.

406 Oliveira *et al.* [22] also identified a striking relationship between the dynamics in time of the first  
407 wave of excess GBS and that of microcephaly. Their Figure 1B shows the dynamics in time of these two  
408 conditions are almost identical apart from a delay of 23 weeks and differing otherwise by a scale factor.  
409 The remarkable similarity in the different epidemic time series allows us to compare the rates of GBS  
410 cases to those of microcephaly. By examining the peak heights of the two diseases, the ratio between  
411 them is 6.1 (maximum of microcephaly divided by maximum of GBS wave), which corresponds to 1 GBS  
412 case for every 6.1 microcephaly cases. If we make the reasonable assumption that the reporting rate of

413 both conditions is similar, it is clear that GBS is a much rarer disease than microcephaly. Nevertheless,  
414 we still chose to predict ZIKV cases based on GBS rather than microcephaly cases, because of problems  
415 in the correct reporting of microcephaly over the study period. For example, the criteria for identifying  
416 microcephaly changed dramatically at different times over the two year period and in different areas,  
417 making the reporting coverage highly unstable. Moreover, previous to this period, reporting was not  
418 compulsory nor was there consistently defined criteria for identifying the condition.

419 Return now to the dynamics of the reconstructed ZIKV cases generated by Eqns (1) as calibrated  
420 on the GBS data (Fig 4). The reproductive number,  $\mathcal{R}_0(t)$ , which quantifies the transmission rate, was  
421 reconstructed by modelling the local meteorological data with Eqn (6). The estimated  $\mathcal{R}_0(t)$  was found  
422 to oscillate due to seasonality between the values  $1.1 < \mathcal{R}_0 < 3.3$ , and on average was found  $\langle \mathcal{R}_0 \rangle = 2.2$ .  
423 The average level and estimated range of  $\mathcal{R}_0(t)$  are in line with previous studies [12, 44, 52]. Because  
424 of temperature dependence,  $\mathcal{R}_0(t)$  reached minimum values in winters. The range of values the model  
425 predicted for  $\mathcal{R}_0(t)$  is very similar to the intensities reported in Fig 3 of [12] for ZIKV in Brazil.

426 As the net growth rate of mosquitoes tends to increase as temperature increases [12, 54, 55], it is not  
427 surprising that our estimated  $p_1 > 0$  (the temperature dependence parameter in  $m(t)$ ) is positive. The  
428 positive association between temperature and transmissibility has also been observed in the literature  
429 [52]. Significant nonzero estimates were found for parameters  $p_3$  and  $p_4$ , which also control  $m(t)$ ,  
430 and thus the reproductive number  $\mathcal{R}_0$ . This immediately suggests the existence of non-weather-driven  
431 temporal changes in the ZIKV transmissibility. The baseline drop in  $m(t)$  would also lead to a drop  
432 in  $\mathcal{R}_0(t)$ , and indicates a decrease in ZIKV transmissibility across the two epidemic waves. Since the  
433 official mandatory ZIKV reporting started on February 2016, this could have increased public awareness  
434 of ZIKV risk, and thus prevented infection effectively [53, 56, 57, 58, 59]. Disease control measures were  
435 also introduced by some local authorities during the second epidemic wave. The time-change point ( $\tau_1$ )  
436 when the baseline  $p_3$  switches to  $p_4$  in the model corresponds to March 7 of 2016. Interestingly, this  
437 time point coincides with the peak timing of the concurrent CHIKV outbreak [22]. Also, very close to  
438 this date,  $\mathcal{R}_0(t)$  passed through a local minimum and then increased for a two month period, generating  
439 in turn an increase in GBS cases.

440 We compared the results of a non-mechanistic model in Supplementary Information S3 which did  
441 not take into account climatic factors, and those from our climate-driven model in Fig 4. Although the  
442 non-mechanistic model did not perform as well, it nevertheless provided useful insights by producing  
443 results that matched the impact of the daily temperature on  $\mathcal{R}_0$ , the transmission of ZIKV.

444 Continuing further, we now attempt to estimate the reporting rate of ZIKV. We argue that the  
445 reporting rate of ZIKV disease increased dramatically around February and March of 2016, as suggested  
446 also in the literature [52]. Thus, it is reasonable to assume that the data for the second wave of ZIKV  
447 in 2016 is more reliable than that of the first. Taking the maximum of the second ZIKV wave divided  
448 by the maximum of the GBS wave, we find the ratio between the two diseases is 435.6; i.e., 1 GBS case  
449 per 435.6 reported ZIKV cases. However, our model fitting finds a ratio between GBS and symptomatic  
450 ZIKV cases as  $\rho = 0.000061$ , or 1 GBS case per 16,393 ZIKV symptomatic cases. Thus, we can conclude  
451 that the reporting ratio of symptomatic ZIKV cases is roughly  $16393/435.6 \approx 38$ . Namely for every 38  
452 symptomatic ZIKV cases, there was 1 case reported, over the second wave in 2016. Hence we arrive at  
453 an estimate for the reporting ratio of ZIKV, namely 1:38. Moreover, as mentioned, when taking this  
454 reporting ratio into account our estimated IAR falls in the reasonable range 22% to 28% for the two  
455 waves.

456 Previous estimates of IAR relied on poor ZIKV data in Brazilian regions: some estimates appear to  
457 be less than 20%, and others yield more than 50% (see Supplementary Information S4). As mentioned,  
458 all these estimates must be treated with caution. This study is the first to use the more reliable GBS  
459 data as a proxy to estimate the IAR of ZIKV epidemics. We found that the IAR is likely to be below  
460 33%.

461 In conclusion, we comment on the likelihood of a future major ZIKV outbreak in NE Brazil. Let  
462 us start from a “naive assumption” that the whole population (100%) in NE Brazil was susceptible to  
463 ZIKV at the beginning of 2015, even though it was probably less than 100%. Our results tell us that  
464 the estimated IAR is most likely below 33%. This indicates that after the 2015-2016 ZIKV outbreaks,  
465 probably more than  $(100 - 33\% =)$  67% of the population were susceptible and immune-naive. That  
466 is,  $S_h > 67\%$ , after the last ZIKV outbreak that ended in 2016.

467 Recall that the effective reproduction number,  $\mathcal{R}_{\text{eff}} = S_h \mathcal{R}_0 < 1$ , must be less than unity to  
468 ensure the epidemic will not emerge. Given the susceptibility at the end of the outbreak was more  
469 than 67%, then we need  $\mathcal{R}_0 < 1/S_h = 1/67\% \approx 1.5$  to ensure  $\mathcal{R}_{\text{eff}} < 1$  under the naive assumption,  
470 and no outbreak will emerge. An  $\mathcal{R}_0$  larger than approximately 1.5 will lead to a ZIKV outbreak.  
471 On the other hand, according to our estimation (Table 3), the initial susceptibility,  $S_h(0)$ , at the start  
472 of 2015 was likely to be below 75%. As Table 3 shows that, typically,  $S_h(0) = 0.57\%$  with 95% CI:  
473 47% - 74%. Thus, at least  $(1 - 75\% =)$  25% of the (susceptible) population was not affected at all  
474 during the 2015-16 ZIKV epidemic waves in NE Brazil. It is possibly that this 25% (or more) of the  
475 population, were protected because of cross-protection from infection with other *Flaviviridae* and/or  
476 because of living in zones where ZIKV cannot persist, etc. With this possibility, we now have over  
477  $((100\% - 25\%) - \text{IAR} > (1 - 25\%) - 33\% =)$  42% of the population who are still immune-naive and  
478 unprotected after the 2015-16 epidemic. Therefore, if  $\mathcal{R}_0 < 1/S_h < 1/42\% \approx 2.38$ , a ZIKV outbreak  
479 will not occur. Now the estimated average  $\langle \mathcal{R}_0 \rangle = 2.2$  in Fig 4, which ensures  $\langle \mathcal{R}_{\text{eff}} \rangle < 1$  and implies  
480 that it would be difficult for a ZIKV outbreak to appear in NE Brazil in the near future.

## 481 List of abbreviations

| Abbreviation | Full term                            |
|--------------|--------------------------------------|
| CHIKV        | Chikungunya virus                    |
| DENV         | Dengue virus                         |
| ZIKV         | Zika virus                           |
| GBS          | Guillain-Barré syndrome              |
| IAR          | infection attack rate                |
| BIC          | Bayesian information criterion       |
| NE           | Northeastern                         |
| NB           | negative-binomial                    |
| POMP         | partially observed Markov process    |
| CI           | confidence interval                  |
| MLE          | maximum likelihood estimate          |
| PRCC         | partial rank correlation coefficient |

## 482 **Declarations**

483 **Ethics approval and consent to participate** Since no personal data was collected, the ethical  
484 approval or individual consent is not applicable.

485 **Availability of data and materials** The epidemic time series data were kindly provided by Professor  
486 Oliveira from the Ministry of Health in Brazil, as used in their recent study [22].

487 **Consent for publication** Not applicable.

488 **Funding** The authors declare that this study is not funded.

489 **Acknowledgements** The authors would like to acknowledge Professor Oliveira from the Ministry of  
490 Health in Brazil for kindly sharing the disease surveillance data used in this work.

491 **Disclaimer** The funding agencies had no role in the design and conduct of the study; collection, man-  
492 agement, analysis, and interpretation of the data; preparation, review, or approval of the manuscript;  
493 or decision to submit the manuscript for publication.

494 **Conflict of Interests** The authors declare that they have no competing interests.

495 **Authors' Contributions** DH conceived the study. DH and SZ carried out the study. DH, SZ and  
496 LS discussed the results. DH, SZ, QL and LS drafted the first manuscript. DH, SZ, SSM and LS revised  
497 the manuscript. All authors gave final approval for publication.

## 498 References

- 499 [1] Dick GW, Kitchen SF, Haddow AJ. Zika virus (I). Isolations and serological specificity. Transactions of the royal  
500 society of tropical medicine and hygiene. 1952;46(5):509-20.
- 501 [2] Moore D, Causey OR, Carey DE, Reddy S, Cooke AR, Akinkugbe FM, David-West TS, Kemp GE. Arthropod-borne  
502 viral infections of man in Nigeria, 1964-1970. Annals of Tropical Medicine & Parasitology. 1975;69(1):49-64.
- 503 [3] Wikan N, Smith DR. Zika virus: history of a newly emerging arbovirus. The Lancet Infectious diseases.  
504 2016;16(7):e119-26.
- 505 [4] Petersen LR, Jamieson DJ, Powers AM, Honein MA. Zika virus. New England Journal of Medicine.  
506 2016;374(16):1552-63.
- 507 [5] Mlakar J, Korva M, Tul N, Popovi M, Poljak-Prijatelj M, Mraz J, Kolenc M, Resman Rus K, Vesnaver Vipot-  
508 nik T, Fabjan Voduek V, Vizjak A. Zika virus associated with microcephaly. New England Journal of Medicine.  
509 2016;374(10):951-8.
- 510 [6] Gao D, Lou Y, He D, Porco TC, Kuang Y, Chowell G, Ruan S. Prevention and control of Zika as a mosquito-borne  
511 and sexually transmitted disease: a mathematical modeling analysis. Scientific Reports. 2016;6.
- 512 [7] Towers S, Brauer F, Castillo-Chavez C, Falconar AK, Mubayi A, Romero-Vivas CM. Estimate of the reproduction  
513 number of the 2015 Zika virus outbreak in Barranquilla, Colombia, and estimation of the relative role of sexual  
514 transmission. Epidemics. 2016;17:50-5.
- 515 [8] Atkinson B, Hearn P, Afrough B, Lumley S, Carter D, Aarons EJ, Simpson AJ, Brooks TJ, Hewson R. Detection of  
516 Zika virus in semen. Emerging infectious diseases. 2016;22(5):940.
- 517 [9] Musso D, Roche C, Robin E, Nhan T, Teissier A, Cao-Lormeau VM. Potential sexual transmission of Zika virus.  
518 Emerging infectious diseases. 2015;21(2):359.
- 519 [10] World Health Organization (WHO) official website, zika virus fact sheet. [http://www.who.int/mediacentre/  
520 factsheets/zika/en/](http://www.who.int/mediacentre/factsheets/zika/en/); accessed on June 2017.
- 521 [11] Duffy MR, Chen TH, Hancock WT, Powers AM, Kool JL, Lanciotti RS, Pretrick M, Marfel M, Holzbauer S,  
522 Dubray C, Guillaumot L. Zika virus outbreak on Yap Island, federated states of Micronesia. N Engl J Med.  
523 2009;360(25):2536-43.
- 524 [12] Zhang Q, Sun K, Chinazzi M, Piontti AP, Dean NE, Rojas DP, Merler S, Mistry D, Poletti P, Rossi L, Bray M.  
525 Spread of Zika virus in the Americas. Proceedings of the National Academy of Sciences. 2017;201620161.
- 526 [13] Campos GS, Bandeira AC, Sardi SI. Zika virus outbreak, bahia, brazil. Emerging infectious diseases.  
527 2015;21(10):1885.
- 528 [14] Oehler E, Watrin L, Larre P, Leparc-Goffart I, Lastere S, Valour F, Baudouin L, Mallet HP, Musso D, Ghawche F.  
529 Zika virus infection complicated by Guillain-Barré syndrome: case report, French Polynesia, December 2013. Euro-  
530 surveillance. 2014;19(9):20720.
- 531 [15] Mier-y-Teran-Romero L, Delorey MJ, Sejvar JJ, Johansson MA. Guillain-Barré syndrome risk among individuals  
532 infected with Zika virus: a multi-country assessment. BMC medicine. 2018;16(1):67.
- 533 [16] Guillain-Barré Syndrome Fact Sheets from World Health Organization official website. [http://www.who.int/  
534 mediacentre/factsheets/guillain-barre-syndrome/en/](http://www.who.int/mediacentre/factsheets/guillain-barre-syndrome/en/); accessed on June 2017.
- 535 [17] The News press entitled “Exclusive: Brazil says Zika virus outbreak worse than believed”, the Reuters. [http:  
536 //www.reuters.com/article/us-health-zika-brazil-exclusive-idUSKCN0VA331](http://www.reuters.com/article/us-health-zika-brazil-exclusive-idUSKCN0VA331); accessed on January  
537 2018.
- 538 [18] Cauchemez S, Besnard M, Bompard P, Dub, T, Guillemette-Artur P, Eyrolle-Guignot D, Salje H, Van Kerkhove M,  
539 Abadie V, Garel C, and others . Association between Zika virus and microcephaly in French Polynesia, 2013-15: a  
540 retrospective study. The Lancet, 2016;387(10033), 2125-2132.

- 541 [19] Aubry M, Teissier A, Huart M, Merceron S, Vanhomwegen J, Roche C, *et al.* Zika Virus Seroprevalence, French  
542 Polynesia, 2014-2015. *Emerg Infect Dis.* 2017;23(4):669-672.
- 543 [20] Cao-Lormeau VM, Blake A, Mons S, Lastere S, Roche C, Vanhomwegen J, Dub T, Baudouin L, Teissier A, Larre P,  
544 Vial AL. Guillain-Barre Syndrome outbreak associated with Zika virus infection in French Polynesia: a case-control  
545 study. *The Lancet.* 2016;387(10027):1531-9.
- 546 [21] Oehler E, Fournier E, Leparc-Goffart I, Larre P, Cubizolle S, Sookhareea C, Lastere S, Ghawche F. Increase in  
547 cases of Guillain-Barre syndrome during a Chikungunya outbreak, French Polynesia, 2014 to 2015. *Euro Surveill.*  
548 2015;20(48):30079.
- 549 [22] de Oliveira WK, Carmo EH, Henriques CM, Coelho G, Vazquez E, Cortez-Escalante J, Molina J, Aldighieri S,  
550 Espinal MA, Dye C. Zika Virus Infection and Associated Neurologic Disorders in Brazil. *New England Journal of*  
551 *Medicine.* 2017;376(16):1591-3.
- 552 [23] Nishiura H, Mizumoto K, Rock KS, Yasuda Y, Kinoshita R, Miyamatsu Y. A theoretical estimate of the risk of  
553 microcephaly during pregnancy with Zika virus infection. *Epidemics.* 2016;15:66-70.
- 554 [24] Ellington SR, Devine O, Bertolli J, Quiones AM, Shapiro-Mendoza CK, Perez-Padilla J, Rivera-Garcia B, Simeone  
555 RM, Jamieson DJ, Valencia-Prado M, Gilboa SM. Estimating the number of pregnant women infected with Zika virus  
556 and expected infants with microcephaly following the Zika virus outbreak in Puerto Rico, 2016. *JAMA pediatrics.*  
557 2016;170(10):940-5.
- 558 [25] Brasil P, Pereira Jr JP, Moreira ME, Ribeiro Nogueira RM, Damasceno L, Wakimoto M, Rabello RS, Valderramos  
559 SG, Halai UA, Salles TS, Zin AA. Zika virus infection in pregnant women in Rio de Janeiro. *New England Journal*  
560 *of Medicine.* 2016;375(24):2321-34.
- 561 [26] Lebrun G, Chadda K, Reboux AH, Martinet O, Gauzere BA. Guillain-Barre syndrome after chikungunya infection.  
562 *Emerging infectious diseases.* 2009;15(3):495.
- 563 [27] Wielanek AC, De Monredon J, El Amrani M, Roger JC, Serveaux JP. Guillain-Barre syndrome complicating a  
564 Chikungunya virus infection. *Neurology.* 2007;69(22):2105-7.
- 565 [28] Villamil-Gomez W, Silvera LA, Paez-Castellanos J, Rodriguez-Morales AJ. Guillain-Barre syndrome after Chikun-  
566 gunya infection: A case in Colombia. *Enfermedades infecciosas y microbiologia clinica.* 2016;34(2):140-1.
- 567 [29] Economopoulou A, Dominguez M, Helynck B, Sissoko D, Wichmann O, Quenel P, Germonneau P, Quatresous I.  
568 Atypical Chikungunya virus infections: clinical manifestations, mortality and risk factors for severe disease during  
569 the 2005-2006 outbreak on Reunion. *Epidemiology and infection.* 2009 Apr 1;137(04):534-41.
- 570 [30] Victora CG, Schuler-Faccini L, Matijasevich A, Ribeiro E, Pessoa A, Barros FC. Microcephaly in Brazil: how to  
571 interpret reported numbers? *The Lancet.* 2016;387(10019):621-4.
- 572 [31] He D, Gao D, Lou Y, Zhao S, Ruan S. A comparison study of Zika virus outbreaks in French Polynesia, Colombia  
573 and the State of Bahia in Brazil. *Sci Rep.* 2017;7(1):273.
- 574 [32] He D, Ionides EL, King AA. Plug-and-play inference for disease dynamics: measles in large and small populations  
575 as a case study. *J R Soc Interface.* 2010;7:271-83.
- 576 [33] Gourinat AC, OConnor O, Calvez E, Goarant C, Dupont-Rouzeyrol M. Detection of Zika virus in urine. *Emerging*  
577 *infectious diseases.* 2015;21(1):84.
- 578 [34] Musso D, Roche C, Robin E, Nhan T, Teissier A, Cao-Lormeau VM. Potential sexual transmission of Zika virus.  
579 *Emerg Infect Dis.* 2015;21(2):359-61.
- 580 [35] The population statistics in Brazil, the City Population website. [http://www.citypopulation.de/php/  
581 brazil-metro.php](http://www.citypopulation.de/php/brazil-metro.php); accessed on May 2017.
- 582 [36] van den Driessche P, Watmough J. Reproduction numbers and sub-threshold endemic equilibria for compartmental  
583 models of disease transmission. *Mathematical biosciences.* 2002;180(1):29-48.

- 584 [37] Brauer F, Castillo-Chavez C, Mubayi A, Towers S. Some models for epidemics of vector-transmitted diseases. *Infectious Disease Modelling*. 2016;1(1):79-87.  
585
- 586 [38] Sasmal SK, Ghosh I, Huppert A, Chattopadhyay J. Modeling the Spread of Zika Virus in a Stage-Structured  
587 Population: Effect of Sexual Transmission. *Bulletin of mathematical biology*. 2018;80(11):3038-67.
- 588 [39] Allen LJ, Brauer F, Van den Driessche P, Wu J. *Mathematical epidemiology*. Lecture Notes in Mathematics.  
589 2008;1945:81-130.
- 590 [40] Anderson RM, May RM. *Infectious diseases of humans: dynamics and control*. Oxford university press; 1992.
- 591 [41] Breto C, He D, Ionides EL, King AA. Time series analysis via mechanistic models. *The Annals of Applied Statistics*.  
592 2009;3(1):319-48.
- 593 [42] Kucharski AJ, Funk S, Eggo RM, Mallet HP, Edmunds WJ, Nilles EJ. Transmission dynamics of Zika virus in  
594 island populations: a modelling analysis of the 2013/14 French Polynesia outbreak. *PLoS neglected tropical diseases*.  
595 2016;10(5):e0004726.
- 596 [43] Zhao S, Stone L, Gao D, He D. Modelling the large-scale yellow fever outbreak in Luanda, Angola, and the impact  
597 of vaccination. *PLoS neglected tropical diseases*. 2018;12(1):e0006158.
- 598 [44] Champagne C, Salthouse DG, Paul R, Cao-Lormeau VM, Roche B, Cazelles B. Structure in the variability of the  
599 basic reproductive number ( $R_0$ ) for Zika epidemics in the Pacific islands. *Elife*. 2016;5:e19874.
- 600 [45] Paploski IA, Prates AP, Cardoso CW, Kikuti M, Silva MM, Waller LA, Reis MG, Kitron U, Ribeiro GS. Time  
601 lags between exanthematous illness attributed to Zika virus, Guillain-Barré syndrome, and microcephaly, Salvador,  
602 Brazil. *Emerging infectious diseases*. 2016;22(8):1438.
- 603 [46] The Centers for Disease Control and Prevention (CDC) official website, the mosquito lifecycle fact sheet. [https://  
604 www.cdc.gov/dengue/resources/factsheets/mosquitolifecyclefinal.pdf](https://www.cdc.gov/dengue/resources/factsheets/mosquitolifecyclefinal.pdf); accessed on January 2019.
- 605 [47] Schwarz G. Estimating the dimension of a model. *Ann Stat*. 1978;6:461-4.
- 606 [48] King AA, Nguyen D, Ionides EL. Statistical inference for partially observed Markov processes via the R package  
607 pomp. *J Stat Softw*. 2016; 69:1-43.
- 608 [49] Zhao S, Lou Y, Chiu AP, He D. Modelling the skip-and-resurgence of Japanese encephalitis epidemics in Hong Kong.  
609 *Journal of theoretical biology*. 2018;454:1-0.
- 610 [50] King AA. Statistical Inference for Partially-Observed Markov Processes. <http://kingaa.github.io/pomp/>;  
611 accessed on March 2017.
- 612 [51] Team RC. R: A language and environment for statistical computing.
- 613 [52] Lourenco J, de Lima MM, Faria NR, Walker A, Kraemer MUG, *et al*. Epidemiological and ecological determinants  
614 of Zika virus transmission in an urban setting. *eLife*. 2017;6:e29820. [https://doi.org/10.7554/eLife.29820.  
615 001](https://doi.org/10.7554/eLife.29820.001).
- 616 [53] Xiao Y, Tang S, Wu J. Media impact switching surface during an infectious disease outbreak. *Scientific reports*.  
617 2015;5:7838.
- 618 [54] Rubel F, Brugger K, Hantel M, Chvala-Mannsberger S, Bakonyi T, Weissenbck H, Nowotny N. Explaining Usutu  
619 virus dynamics in Austria: model development and calibration. *Preventive veterinary medicine*. 2008;85(3-4):166-86.
- 620 [55] Siraj AS, Oidtmann RJ, Huber JH, Kraemer MU, Brady OJ, Johansson MA, Perkins TA. Temperature modulates  
621 dengue virus epidemic growth rates through its effects on reproduction numbers and generation intervals. *PLoS  
622 neglected tropical diseases*. 2017;11(7):e0005797.
- 623 [56] Zhao S, Bauch CT, He D. Strategic decision making about travel during disease outbreaks: a game theoretical  
624 approach. *Journal of The Royal Society Interface*. 2018;15(146):20180515.
- 625 [57] Mitchell L, Ross JV. A data-driven model for influenza transmission incorporating media effects. *Royal Society open  
626 science*. 2016;3(10):160481.



- 627 [58] Tchuenche JM, Dube N, Bhunu CP, Smith RJ, Bauch CT. The impact of media coverage on the transmission  
628 dynamics of human influenza. *BMC Public Health*. 2011;11(1):S5.
- 629 [59] Funk S, Salathe M, Jansen VA. Modelling the influence of human behaviour on the spread of infectious diseases: a  
630 review. *Journal of the Royal Society Interface*. 2010;7(50):1247-56.
- 631 [60] Andraud M, Hens N, Marais C, Beutels P. Dynamic epidemiological models for dengue transmission: a systematic  
632 review of structural approaches. *PLoS One*;7:e49085.
- 633 [61] Chikaki E, Ishikawa H. A dengue transmission model in Thailand considering sequential infections with all four  
634 serotypes. *J Infect Dev Ctries*. 2009;3:711-22.
- 635 [62] Bearcroft WG. Zika virus infection experimentally induced in a human volunteer. *Transactions of the Royal Society  
636 of Tropical Medicine and Hygiene*. 1956;50(5):442-8.
- 637 [63] Boorman JP, Porterfield JS. A simple technique for infection of mosquitoes with viruses transmission of Zika virus.  
638 *Transactions of the Royal Society of Tropical Medicine and Hygiene*. 1956;50(3):238-42.
- 639 [64] dos Santos T, Rodriguez A, Almiron M, Sanhueza A, Ramon P, de Oliveira WK, Coelho GE, Badar R, Cortez J,  
640 Ospina M, Pimentel R. Zika virus and the GuillainBarré syndromecase series from seven countries. *New England  
641 Journal of Medicine*. 2016;375(16):1598-601.

## 642 **Supplementary Information**

643 **S1 Case Definition of the Guillain-Barré Syndrome**

644 **S2 Brief Information of the Northeastern Brazil**

645 **S3 Fitting Results with Cubic Spline Reconstruction**

646 **S4 Brief Review of the Zika epidemics Infection Attack Rate**

647
